# Supplementary material for: The Nutritional Status of Individuals Adopted Internationally as Children: A Systematic Review
Source: MDPI journal article supplement (doi:10.3390/nu13010245), 2021-01-16
Supplement: s1 [file s1]

# The Nutritional Status of Individuals Adopted Internationally as Children: A Systematic Review

**Richard Ivey** <sup>1,2,\*</sup>, **Marko Kerac** <sup>1,2</sup>, **Michael Quiring** <sup>3</sup>, **Dam Thi Thuy Hang** <sup>3</sup>, **Susie Doig** <sup>3</sup>, **Emily DeLacey** <sup>1,2,3</sup>

<sup>1</sup> Department of Population Health, Faculty of Epidemiology and Population Health, London School of Hygiene & Tropical Medicine, University of London, London, UK; marko.kerac@lshtm.ac.uk (M.K.); emilyd@holtinternational.org (E.D.)

<sup>2</sup> Centre for Maternal, Adolescent, Reproductive & Child Health (MARCH), London School of Hygiene & Tropical Medicine, University of London, London, UK

<sup>3</sup> Holt International, Eugene, OR, USA; michaelq@holtinternational.org (M.Q.); hangd@holtvn.org.vn (D.T.T.H.); susied@holtinternational.org (S.D.)

\* Correspondence: Richard.Ivey1@alumni.lshtm.ac.uk

**List S1.** Preferred Reporting items for Systematic Reviews and Meta-analysis (PRISMA) checklist

| Section/topic             | # | Checklist item                                                                                                                                                                                                                                                                                              | Reported on page # |
|---------------------------|---|-------------------------------------------------------------------------------------------------------------------------------------------------------------------------------------------------------------------------------------------------------------------------------------------------------------|--------------------|
| <b>TITLE</b>              |   |                                                                                                                                                                                                                                                                                                             |                    |
| Title                     | 1 | Identify the report as a systematic review, meta-analysis, or both.                                                                                                                                                                                                                                         | 1                  |
| <b>ABSTRACT</b>           |   |                                                                                                                                                                                                                                                                                                             |                    |
| Structured summary        | 2 | Provide a structured summary including, as applicable: background; objectives; data sources; study eligibility criteria, participants, and interventions; study appraisal and synthesis methods; results; limitations; conclusions and implications of key findings; systematic review registration number. | 1                  |
| <b>INTRODUCTION</b>       |   |                                                                                                                                                                                                                                                                                                             |                    |
| Rationale                 | 3 | Describe the rationale for the review in the context of what is already known.                                                                                                                                                                                                                              | 3                  |
| Objectives                | 4 | Provide an explicit statement of questions being addressed with reference to participants, interventions, comparisons, outcomes, and study design (PICOS).                                                                                                                                                  | 4                  |
| <b>METHODS</b>            |   |                                                                                                                                                                                                                                                                                                             |                    |
| Protocol and registration | 5 | Indicate if a review protocol exists, if and where it can be accessed (e.g., Web address), and, if available, provide registration information including registration number.                                                                                                                               | 4                  |
| Eligibility criteria      | 6 | Specify study characteristics (e.g., PICOS, length of follow-up) and report characteristics (e.g., years considered, language, publication status) used as criteria for eligibility, giving rationale.                                                                                                      | 4                  |
| Information sources       | 7 | Describe all information sources (e.g., databases with dates of coverage, contact with study authors to identify additional studies) in the search and date last searched.                                                                                                                                  | 5                  |
| Search                    | 8 | Present full electronic search strategy for at least one database, including any limits used, such that it could be repeated.                                                                                                                                                                               | 5                  |
| Study selection           | 9 | State the process for selecting studies (i.e., screening, eligibility, included in systematic review, and, if applicable, included in the meta-analysis).                                                                                                                                                   | 5                  |

|                                    |    |                                                                                                                                                                                                                        |    |
|------------------------------------|----|------------------------------------------------------------------------------------------------------------------------------------------------------------------------------------------------------------------------|----|
| Data collection process            | 10 | Describe method of data extraction from reports (e.g., piloted forms, independently, in duplicate) and any processes for obtaining and confirming data from investigators.                                             | 5  |
| Data items                         | 11 | List and define all variables for which data were sought (e.g., PICOS, funding sources) and any assumptions and simplifications made.                                                                                  | 4  |
| Risk of bias in individual studies | 12 | Describe methods used for assessing risk of bias of individual studies (including specification of whether this was done at the study or outcome level), and how this information is to be used in any data synthesis. | 5  |
| Summary measures                   | 13 | State the principal summary measures (e.g., risk ratio, difference in means).                                                                                                                                          | 5  |
| Synthesis of results               | 14 | Describe the methods of handling data and combining results of studies, if done, including measures of consistency (e.g., $I^2$ ) for each meta-analysis.                                                              | 5  |
| Risk of bias across studies        | 15 | Specify any assessment of risk of bias that may affect the cumulative evidence (e.g., publication bias, selective reporting within studies).                                                                           | 5  |
| Additional analyses                | 16 | Describe methods of additional analyses (e.g., sensitivity or subgroup analyses, meta-regression), if done, indicating which were pre-specified.                                                                       | 5  |
| <b>RESULTS</b>                     |    |                                                                                                                                                                                                                        |    |
| Study selection                    | 17 | Give numbers of studies screened, assessed for eligibility, and included in the review, with reasons for exclusions at each stage, ideally with a flow diagram.                                                        | 6  |
| Study characteristics              | 18 | For each study, present characteristics for which data were extracted (e.g., study size, PICOS, follow-up period) and provide the citations.                                                                           | 8  |
| Risk of bias within studies        | 19 | Present data on risk of bias of each study and, if available, any outcome level assessment (see item 12).                                                                                                              | 5  |
| Results of individual studies      | 20 | For all outcomes considered (benefits or harms), present, for each study: (a) simple summary data for each intervention group (b) effect estimates and confidence intervals, ideally with a forest plot.               | 12 |
| Synthesis of results               | 21 | Present results of each meta-analysis done, including confidence intervals and measures of consistency.                                                                                                                | 12 |
| Risk of bias across studies        | 22 | Present results of any assessment of risk of bias across studies (see Item 15).                                                                                                                                        | 5  |
| Additional analysis                | 23 | Give results of additional analyses, if done (e.g., sensitivity or subgroup analyses, meta-regression [see Item 16]).                                                                                                  | 12 |

|                     |    |                                                                                                                                                                                      |    |
|---------------------|----|--------------------------------------------------------------------------------------------------------------------------------------------------------------------------------------|----|
| <b>DISCUSSION</b>   |    |                                                                                                                                                                                      |    |
| Summary of evidence | 24 | Summarize the main findings including the strength of evidence for each main outcome; consider their relevance to key groups (e.g., healthcare providers, users, and policy makers). | 25 |
| Limitations         | 25 | Discuss limitations at study and outcome level (e.g., risk of bias), and at review-level (e.g., incomplete retrieval of identified research, reporting bias).                        | 29 |
| Conclusions         | 26 | Provide a general interpretation of the results in the context of other evidence, and implications for future research.                                                              | 30 |
| <b>FUNDING</b>      |    |                                                                                                                                                                                      |    |
| Funding             | 27 | Describe sources of funding for the systematic review and other support (e.g., supply of data); role of funders for the systematic review.                                           | 30 |

**List S2.** Literature search strategy used for electronic databases.

**Databases:** Medline, CINAHL PLUS, Global Health Database, EMBASE

**Search strategy:** Initial screening based on title and abstract, full text assessment to see if it matches inclusion/exclusion criteria and a data extraction table to summarise information on chosen articles. PRISMA guidelines.

**Search terms:**

1 AND 2 OR 3 will be used during the search process

1) International Adoption: adopt\* AND (migration OR migrate\* OR inter-country)

2) Nutrition: nutrition\* OR malnutrition

3) Anthropometry: ("length-for-age" OR LFA OR LAZ OR linear growth OR stunt\* OR wasting OR wasted OR oedematous OR edematous OR kwashiorkor OR protein-energy OR (SAM OR MAM OR GAM) OR "weight-for-length" OR WFL OR WLZ OR muac OR mid upper arm circumference OR underweight OR thinness OR "weight-for-age" OR WFA OR WAZ OR An?emi\* OR H?emoglobin Level\* OR BMI OR Body mass index OR overweight)

**Inclusion criteria:** Studies after 1995, English, contained research related to international adoption, children, nutrition, anthropometric data or micronutrient status, data based on those who were adopted internationally as children (under 18), peer reviewed and contains anthropometric data using standardized tools such as WHO growth standards.

**Exclusion criteria:** National adoption, insufficient anthropometric measurements, incorrect study population, no full text.

**Medline:**

Database: Ovid MEDLINE(R) <1946 to June Week 1 2020>

Search Strategy:

- 
- 1 Adoption/ (4783)
  - 2 Child, Adopted/ (78)
  - 3 adopt\*.mp. [mp=title, abstract, original title, name of substance word, subject heading word, floating sub-heading word, keyword heading word, organism supplementary concept word, protocol supplementary concept word, rare disease supplementary concept word, unique identifier, synonyms] (203773)
  - 4 1 or 2 or 3 (203773) [TOTAL FOR ADOPTION]
  - 5 exp Human Migration/ (26222)
  - 6 exp "emigrants and immigrants"/ or "transients and migrants"/ (23421)
  - 7 (migrant\* or migration or immigrant\* or transient\* or international\*).mp. (880486)
  - 8 5 or 6 or 7 (888801) [TOTAL FOR international]
  - 9 4 and 8 (14989) [TOTAL FOR INTERNATIONAL ADOPTION]
  - 10 exp "nutritional and metabolic diseases"/ (1270864)
  - 11 (nutrition\* or malnutrition\*).mp. (359644)
  - 12 10 or 11 (1530028) [TOTAL FOR NUTRITION OR MALNUTRITION]
  - 13 ("length-for-age" or LFA or LAZ or linear growth or stunt\* or wasting or wasted or oedematous or edematous or kwashiorkor or protein-energy or SAM or MAM or GAM or "weight-for-length" or WFL or WLZ or muac or mid upper arm circumference or underweight or thinness or "weight-for-age" or WFA or WAZ or An?emi\* or H?emoglobin Level\* or BMI or Body mass index or overweight).mp. (535982)
  - 14 exp Growth Disorders/ (32778)
  - 15 body mass index/ (125696)
  - 16 exp body weight changes/ or exp overweight/ or thinness/ (264293)

- 17 exp Anemia/ (160467)
- 18 13 or 14 or 15 or 16 or 17 (746420) [TOTAL FOR GROWTH DISORDERS ETC]
- 19 9 and 12 (901) [TOTAL FOR INT-ADOPTION AND (NUTRITION OR MALNUTRITION)]
- 20 9 and 18 (475) [TOTAL FOR INT-ADOPTION AND GROWTH DISORDERS]
- 21 9 and 12 and 18 (257) [TOTAL FOR INT-ADOPTION AND (NUTRITION OR MALNUTRITION) AND GROWTH DISORDERS]

19 or 20 will be used for the search.

#### **Embase, Global Health and CINAHL PLUS:**

- 1 Adoption/
- 2 limit 1 to yr="1995 -Current"
- 3 Child, Adopted/
- 4 limit 3 to yr="1995 -Current"
- 5 Adopt\*.mp. [mp=title, abstract, heading word, drug trade name, original title, device manufacturer, drug manufacturer, device trade name, keyword, floating subheading word, candidate term word]
- 6 limit 5 to yr="1995 -Current"
- 7 2 or 4 or 6
- 8 exp Human Migration/
- 9 limit 8 to yr="1995 -Current"
- 10 exp "Emigrants and Immigrants"/
- 11 limit 10 to yr="1995 -Current"
- 12 (migrant\* or migration or immigrant\* or transient\* or international\*).mp. [mp=title, abstract, heading word, drug trade name, original title, device manufacturer, drug manufacturer, device trade name, keyword, floating subheading word, candidate term word]
- 13 limit 12 to yr="1995 -Current"
- 14 9 or 11 or 13
- 15 7 and 14
- 16 exp "nutritional and metabolic diseases"/
- 17 limit 16 to yr="1995 -Current"
- 18 (nutrition\* or malnutrition\*).mp. [mp=title, abstract, heading word, drug trade name, original title, device manufacturer, drug manufacturer, device trade name, keyword, floating subheading word, candidate term word]
- 19 limit 18 to yr="1995 -Current"
- 20 7 or 19
- 21 "length-for-age" or LFA or LAZ or linear growth or stunt\* or wasting or wasted or oedematous or edematous or kwashiorkor or protein-energy or SAM or MAM or GAM or "weight-for-length" or WFL or WLZ or muac or mid upper arm circumference or underweight or thinness or "weight-for-age" or WFA or WAZ or An?emi\* or H?emoglobin Level\* or BMI or Body mass index or overweight).mp. [mp=title, abstract, heading word, drug trade name, original title, device manufacturer, drug manufacturer, device trade name, keyword, floating subheading word, candidate term word]
- 22 limit 21 to yr="1995 -Current"
- 23 exp Growth Disorders/
- 24 limit 23 to yr="1995 -Current"

25 exp Body Mass Index/  
 26 limit 25 to yr="1995 -Current"  
 27 body weight changes/ or exp overweight/ or thinness/  
 28 limit 27 to yr="1995 -Current"  
 29 exp body weight changes/ or exp overweight/ or exp thinness/  
 30 limit 29 to yr="1995 -Current"  
 31 exp Anemia/  
 32 limit 31 to yr="1995 -Current"  
 33 22 or 24 or 26 or 28 or 30 or 32  
 34 15 and 20  
 35 15 and 33  
 36 15 and 20 and 33  
 37 34 or 35

**Table S1.** Studies excluded and reasons

|    | Author, Year            | Reason for exclusion                                                           |
|----|-------------------------|--------------------------------------------------------------------------------|
| 1  | Balding C, 2015         | Non-standard or insufficient Anthropometric measurements or micronutrient data |
| 2  | Baron S, 2000           | Not appropriate population                                                     |
| 3  | Bureau J, 1999          | Not appropriate population                                                     |
| 4  | De Martino M, 2019      | Non-standard or insufficient Anthropometric measurements or micronutrient data |
| 5  | Diamond G, 2003         | Not appropriate population                                                     |
| 6  | Jenista, 2001           | Non-standard or insufficient Anthropometric measurements or micronutrient data |
| 7  | McGuinness T, 2006      | Non-standard or insufficient Anthropometric measurements or micronutrient data |
| 8  | Miller B, 2009          | Non-standard or insufficient Anthropometric measurements or micronutrient data |
| 9  | Mitchell M, 1997        | Non-standard or insufficient Anthropometric measurements or micronutrient data |
| 10 | Albers, 2005            | Non-standard or insufficient Anthropometric measurements or micronutrient data |
| 11 | Cataldo, 2006           | Non-standard or insufficient Anthropometric measurements or micronutrient data |
| 12 | Cohen, 2008             | Non-standard or insufficient Anthropometric measurements or micronutrient data |
| 13 | Olivan Gonzalvo G, 2018 | Not appropriate population                                                     |
| 14 | Seminara S, 2011        | Not appropriate population                                                     |
| 15 | Seneckyl Y, 2003        | Non-standard or insufficient Anthropometric measurements or micronutrient data |
| 16 | Ijzendoorn M, 2007      | Not appropriate study type                                                     |
| 17 | Mason P, 2002           | Not appropriate study type                                                     |
| 18 | Mason P, 2005           | Not appropriate study type                                                     |
| 19 | Mason P, 2005           | Not appropriate study type                                                     |

|    |                          |                            |
|----|--------------------------|----------------------------|
| 20 | Barratt M, 2013          | Not appropriate study type |
| 21 | Altemeier, 2000          | Not appropriate study type |
| 22 | Schulte E, 2005          | Not appropriate study type |
| 23 | Aita, 2011               | Not appropriate study type |
| 24 | Cataldo F, 2012          | Other language             |
| 25 | Brown M. S, 1999         | Could not find full text   |
| 26 | Coulot, 2003             | Other language             |
| 27 | Johnson, 2000            | Other language             |
| 28 | Laubjerg M, 2006         | Other language             |
| 29 | Le Masme A, 1999         | Other language             |
| 30 | Miller, 1999             | Not appropriate study type |
| 31 | Montano, 2013            | Could not find full text   |
| 32 | Nicholson, 2002          | No anthropometric data     |
| 33 | Paricio Talayero, 1998   | Not appropriate population |
| 34 | Sonego, 2002             | Other language             |
| 35 | Tomlinson-Hansen S, 2015 | No anthropometric data     |
| 36 | Virdis R, 2019           | Not appropriate study type |
| 37 | Virdis R, 2013           | Could not find full text   |
| 38 | Zaffaroni M, 2018        | Could not find full text   |



**Table S2.** NICE risk of bias assessment

|       |                     |
|-------|---------------------|
|       | Rating System       |
| Best  | ++                  |
|       | +                   |
| Worse | –                   |
|       | NR (not reported)   |
|       | NA (not applicable) |

|                 | Population |     |     | Method of allocation to intervention (or comparison) |        |        |     |     |        |        |        |        |      | Outcomes |     |     |     |        |     | Analyses |        |        |        |        |        | Sum-<br>mary |     |
|-----------------|------------|-----|-----|------------------------------------------------------|--------|--------|-----|-----|--------|--------|--------|--------|------|----------|-----|-----|-----|--------|-----|----------|--------|--------|--------|--------|--------|--------------|-----|
| Paper           | 1.1        | 1.2 | 1.3 | 2.1                                                  | 2.2    | 2.3    | 2.4 | 2.5 | 2.6    | 2.7    | 2.8    | 2.9    | 2.10 | 3.1      | 3.2 | 3.3 | 3.4 | 3.5    | 3.6 | 4.1      | 4.2    | 4.3    | 4.4    | 4.5    | 4.6    | 5.1          | 5.2 |
| Albers, 1997    | +          | +   | +   | +                                                    | ++     | +      | -   | +   | N<br>A | +      | -      | ++     | ++   | ++       | +   | ++  | ++  | ++     | +   | +        | N<br>A | N<br>A | NR     | -      | N<br>R | +            | +   |
| Bortone, 2019   | ++         | ++  | ++  | ++                                                   | N<br>A | N<br>A | -   | +   | N<br>A | ++     | +      | N<br>A | NA   | ++       | ++  | ++  | ++  | ++     | +   | N<br>A   | -      | N<br>A | N<br>A | -      | -      | +            | -   |
| Buonsenso, 2019 | ++         | ++  | ++  | +                                                    | ++     | ++     | -   | -   | ++     | ++     | ++     | N<br>A | NA   | ++       | ++  | +   | ++  | -      | -   | +        | N<br>R | N<br>R | ++     | ++     | ++     | +            | +   |
| Cataldo, 2007   | ++         | ++  | -   | -                                                    | ++     | ++     | -   | +   | N<br>A | ++     | N<br>A | N<br>A | NA   | ++       | +   | ++  | ++  | N<br>A | -   | -        | N<br>A | -      | +      | -      | -      | -            | -   |
| Chiappini, 2016 | ++         | ++  | +   | ++                                                   | +      | N<br>A | -   | -   | +      | N<br>A | ++     | N<br>A | NA   | ++       | ++  | ++  | ++  | N<br>A | -   | +        | N<br>A | N<br>A | +      | N<br>A | -      | +            | -   |
| Fuglestad, 2008 | +          | -   | -   | -                                                    | +      | -      | -   | -   | N<br>A | ++     | ++     | N<br>A | NA   | ++       | -   | +   | ++  | N<br>A | -   | -        | N<br>A | -      | -      | ++     | -      | -            | -   |
| Fuglestad, 2016 | ++         | +   | -   | +                                                    | ++     | -      | +   | +   | N<br>A | +      | ++     | N<br>A | NA   | ++       | -   | +   | ++  | +      | -   | -        | N<br>A | -      | +      | ++     | ++     | +            | +   |

|                 |    |    |    |    |     |     |   |    |     |    |     |     |    |    |    |    |    |     |    |     |     |   |    |    |    |   |   |
|-----------------|----|----|----|----|-----|-----|---|----|-----|----|-----|-----|----|----|----|----|----|-----|----|-----|-----|---|----|----|----|---|---|
| Gustafson, 2013 | ++ | ++ | ++ | ++ | N A | N A | - | +  | N A | ++ | +   | N A | NA | ++ | ++ | ++ | ++ | ++  | +  | N A | N A | - | -  | -  | -  | + | - |
| Johnasson, 2002 | ++ | ++ | -  | +  | +   | +   | + | +  | +   | ++ | +   | N A | NA | ++ | +  | +  | +  | +   | +  | +   | N A | + | ++ | +  | ++ | + | + |
| Johnson, 2011   | ++ | ++ | -  | -  | ++  | ++  | + | +  | +   | +  | +   | N A | NA | ++ | -  | +  | ++ | -   | -  | -   | -   | + | +  | -  | -  | + | - |
| Le Mare, 2006   | ++ | -  | -  | ++ | ++  | -   | - | +  | +   | +  | ++  | N A | NA | -  | -  | -  | ++ | +   | ++ | +   | N R | - | +  | ++ | -  | + | - |
| Ortiz, 2015     | -  | ++ | -  | -  | -   | +   | - | ++ | ++  | +  | ++  | N A | NA | ++ | +  | +  | ++ | +   | -  | -   | N A | + | -  | ++ | +  | - | + |
| Miller, 2015    | -  | ++ | -  | -  | ++  | +   | - | +  | +   | +  | N A | N A | NA | ++ | ++ | -  | ++ | N A | -  | -   | N A | - | +  | -  | ++ | - | + |
| Miller, 2005    | ++ | ++ | ++ | +  | -   | +   | - | +  | ++  | +  | +   | N A | NA | ++ | ++ | +  | ++ | -   | -  | -   | N A | - | +  | ++ | ++ | + | + |
| Miller, 2008    | +  | -  | -  | +  | +   | ++  | - | -  | ++  | ++ | N A | N A | NA | ++ | ++ | -  | ++ | -   | -  | -   | -   | - | +  | ++ | ++ | - | + |
| Miller, 2000    | ++ | ++ | +  | -  | -   | ++  | - | -  | +   | -  | ++  | N A | NA | ++ | +  | ++ | ++ | N A | -  | -   | N A | + | +  | ++ | ++ | - | + |
| Palacios, 2011  | ++ | ++ | -  | -  | +   | +   | - | +  | +   | +  | N R | N A | NA | ++ | +  | -  | ++ | -   | -  | +   | N R | - | +  | ++ | +  | + | + |
| Park, 2011      | ++ | +  | -  | -  | -   | ++  | - | -  | ++  | +  | -   | N A | NA | ++ | -  | ++ | ++ | -   | -  | -   | -   | - | +  | ++ | -  | - | - |
| Pomerleau, 2005 | ++ | ++ | -  | +  | ++  | ++  | - | +  | ++  | +  | -   | N A | NA | ++ | +  | ++ | ++ | ++  | -  | -   | N R | - | +  | -  | +  | - | - |
| Reeves, 2000    | ++ | -  | -  | -  | ++  | ++  | + | +  | ++  | +  | ++  | N A | NA | ++ | +  | +  | ++ | ++  | +  | -   | N A | + | +  | +  | -  | - | + |

|                         |    |    |   |   |    |    |   |    |    |    |        |        |    |    |    |    |    |        |    |    |        |        |    |    |    |   |   |
|-------------------------|----|----|---|---|----|----|---|----|----|----|--------|--------|----|----|----|----|----|--------|----|----|--------|--------|----|----|----|---|---|
| Salerno,<br>2018        | ++ | ++ | + | + | +  | ++ | + | +  | ++ | ++ | N<br>A | N<br>A | NA | ++ | +  | +  | ++ | N<br>A | -  | ++ | N<br>A | +      | -  | ++ | ++ | + | + |
| Ulijaszek,<br>2013      | ++ | ++ | - | + | ++ | +  | + | ++ | ++ | +  | ++     | N<br>A | NA | +  | +  | -  | +  | -      | ++ | -  | N<br>A | N<br>R | +  | -  | +  | + | - |
| Tirella,<br>2011        | ++ | ++ | - | - | ++ | +  | + | ++ | ++ | +  | N<br>A | N<br>A | NA | ++ | +  | ++ | ++ | N<br>A | -  | -  | N<br>A | -      | +  | -  | ++ | - | - |
| Van Kes-<br>teren, 2017 | ++ | ++ | - | + | +  | +  | + | +  | ++ | +  | ++     | N<br>A | NA | ++ | ++ | ++ | ++ | +      | -  | +  | N<br>A | -      | ++ | ++ | -  | + | + |
